# Supplementary material for: DABCO-catalyzed [3 + 2] annulation of sulfamate-derived cyclic imines with isocyanoacetates: synthesis of sulfamate-fused 2-imidazoline
Source: Royal Society of Chemistry journal article supplement (doi:10.1039/c4ob00840e), 2014-06-11

## Supporting Information for

# **DABCO-catalyzed [3 + 2] Annulation of Sulfamate-derived Cyclic Imines with Isocyanoacetates: Synthesis of Sulfamate- fused 2-Imidazoline**

Zhenzhen Gao, Lei Zhang, Zhanhu Sun, Hao Yu, Yumei Xiao,\* and Hongchao Guo\*

Department of Applied Chemistry, China Agricultural University, Beijing 100193, P.  
R. China.

E-Mail: [hchgao@cau.edu.cn](mailto:hchgao@cau.edu.cn)

### **Contents**

|                                                                                       |          |
|---------------------------------------------------------------------------------------|----------|
| General Information                                                                   | S2       |
| Table S1 for Asymmetric Reaction                                                      | S2       |
| General Procedure for the Scaled-up Synthesis                                         | S2       |
| General Procedure for Further Transformation of the Product                           | S2       |
| <sup>1</sup> H and <sup>13</sup> C NMR Spectra of All Compounds <b>3</b> and <b>4</b> | S3 – S22 |

## General Information

All reactions were performed under N<sub>2</sub> atmospheres in oven-dried glassware with magnetic stirring. Unless otherwise stated, all reagents were purchased from commercial suppliers and used without further purification. The solvents employed in the reactions were treated under N<sub>2</sub> atmosphere using the standard procedure. Flash column chromatography was performed using Qingdao Haiyang flash silica gel (200–300 mesh). Infrared spectra were recorded using a Bruker Optics TENSOR 27 instrument. <sup>1</sup>H and <sup>13</sup>C NMR spectra were recorded in CDCl<sub>3</sub> using a 300MHz NMR instrument (referenced internally to Me<sub>4</sub>Si). Accurate mass measurements were performed using an Agilent instrument with the ESI-MS technique. Melting points were determined by a X-4 digital micro melting point apparatus. X-ray crystallographic data were collected using a MM007HF Saturn724+.

**Table S1** Chiral amine-catalyzed [3 + 2] annulation of sulfamate-derived cyclic imine (**1a**) with isocyanoacetate (**2a**)<sup>a</sup>

| 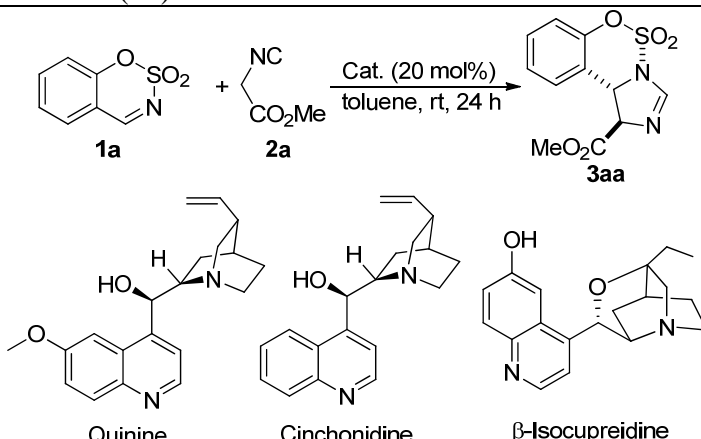 |                 |                        |                 |  |
|-------------------------------------------------------------------------------------|-----------------|------------------------|-----------------|--|
| Entry                                                                               | Cat.            | Yield <sup>b</sup> (%) | ee <sup>c</sup> |  |
| 1                                                                                   | Quinine         | 83                     | 0               |  |
| 2                                                                                   | Cinchonidine    | 91                     | 0               |  |
| 3                                                                                   | β-Isocupreidine | 80                     | 0               |  |

<sup>a</sup> Unless otherwise indicated, reactions were performed with **1a** (0.2 mmol), **2a** (0.22 mmol) and the catalyst (0.04 mmol) in 2.0 mL of toluene. <sup>b</sup> Isolated yields. <sup>c</sup> Determined by Chiral HPLC analysis. dr had not been determined.

## General Procedure for the Scaled-up Synthesis

Under a N<sub>2</sub> atmosphere, to a stirred solution of cyclic imines **1a** (2 mmol) and DABCO (0.4 mmol) in toluene (20 mL) was added methyl 2-isocyanoacetate **2a** (2.2 mmol) via a syringe in one portion. Then the reaction solution was vigorously stirred at room temperature and monitored by TLC. After the reaction was complete, the mixture was concentrated and purified by column chromatography on silica gel (petroleum ether/EtOAc with 1% of Et<sub>3</sub>N) to furnish the corresponding product **3aa** (0.429 g) as a white solid (76% yield, 30:1 dr).

## General Procedure for Further Transformation of **3aa** to the Derivative **4**

The mixture of water (22 mg, 1.2 mmol), concentrated HCl solution (37%, 40.6 mg, 0.114 mmol), THF (2 mL), and sulfamate-fused 2-imidazoline **3aa** (56.4 mg, 0.2 mmol) was stirred for 8 h at room temperature. Then, the mixture was purified by column chromatography using EtOAc/MeOH (1:1) as eluent to afford **4** (58.3 mg, 97% yield, 5:1 dr). Diastereomeric ratio was calculated through <sup>1</sup>H NMR analysis.

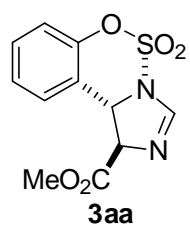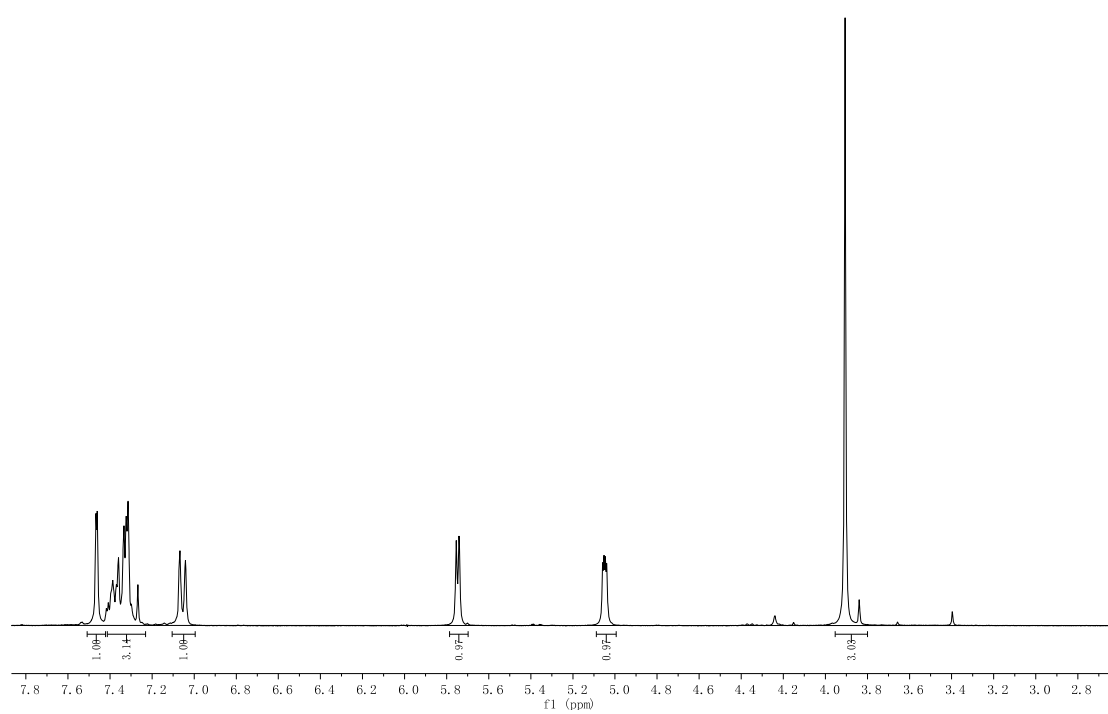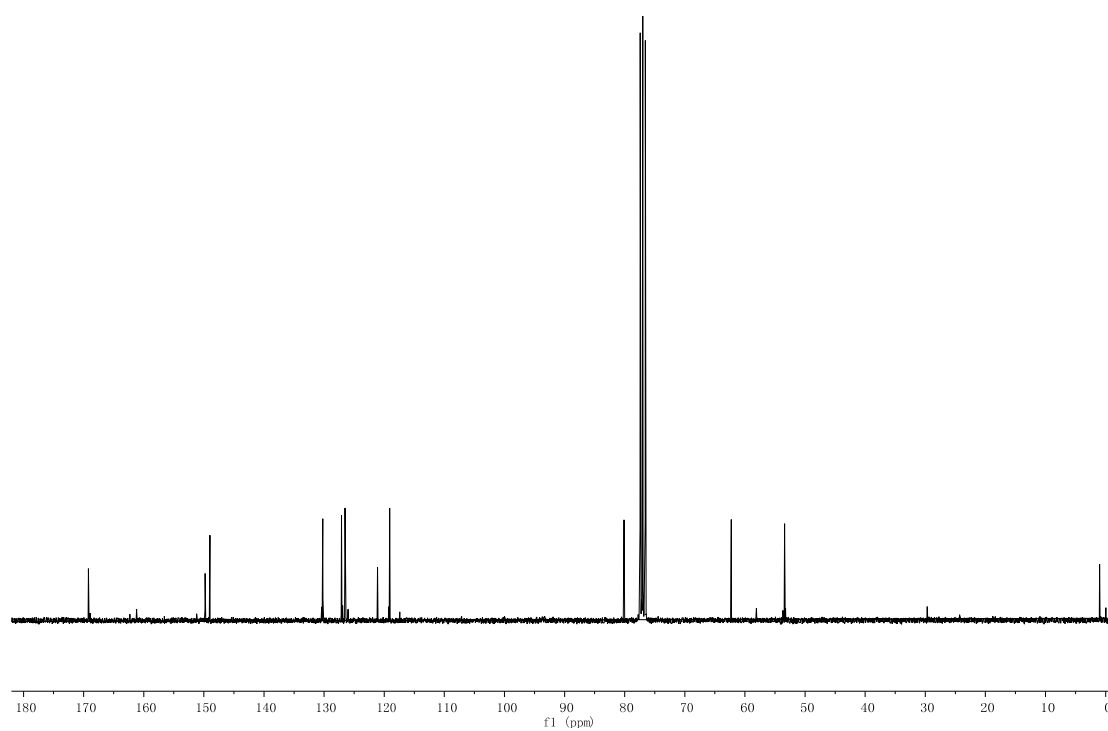

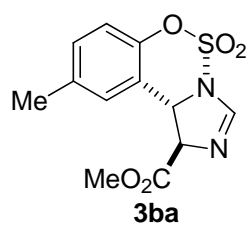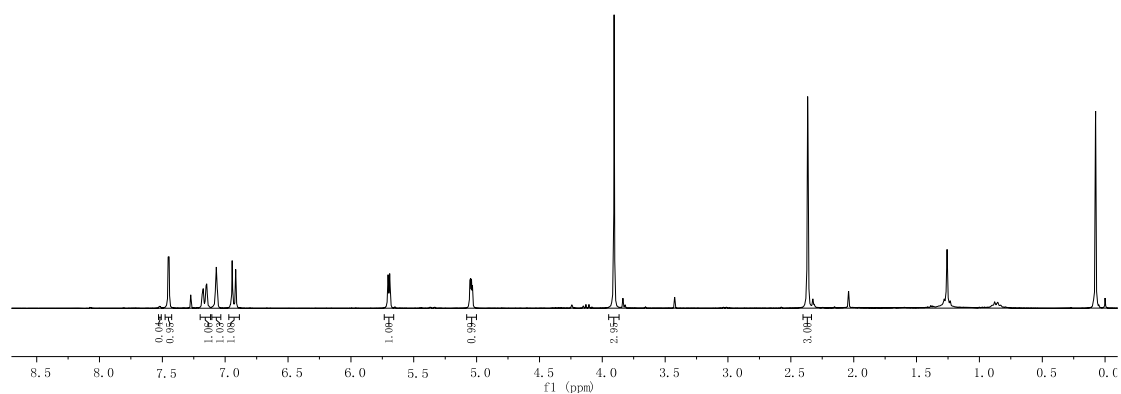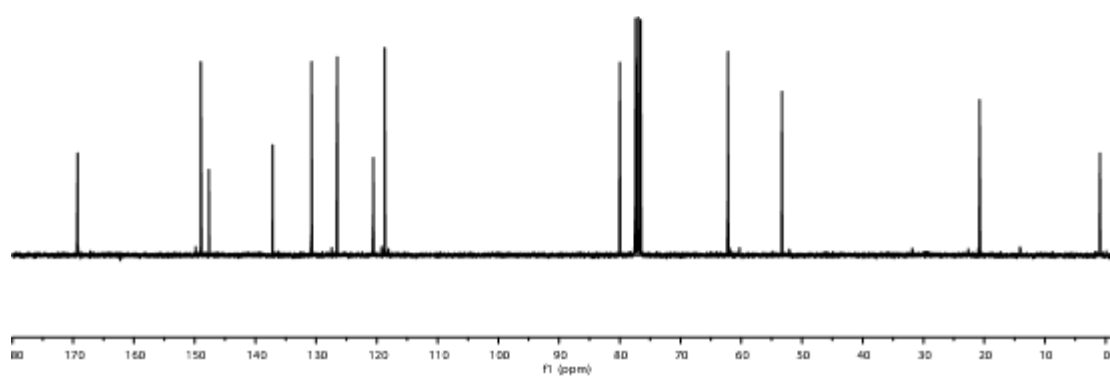

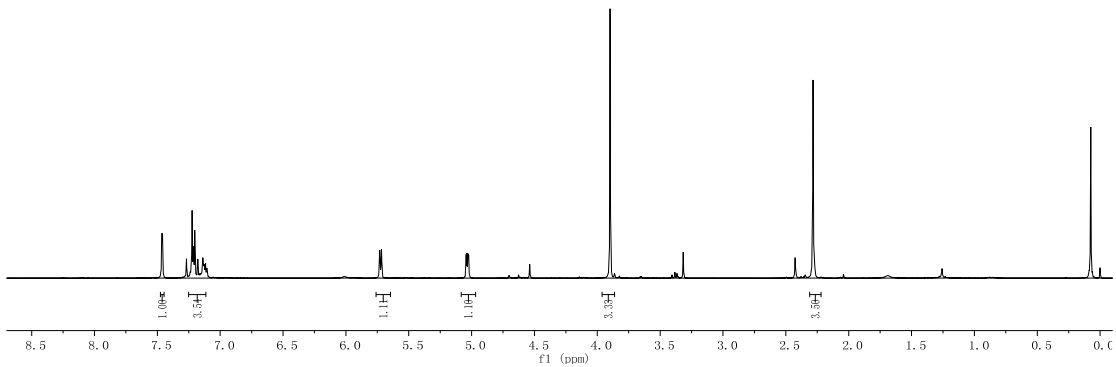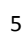

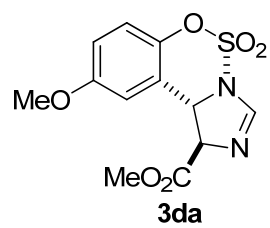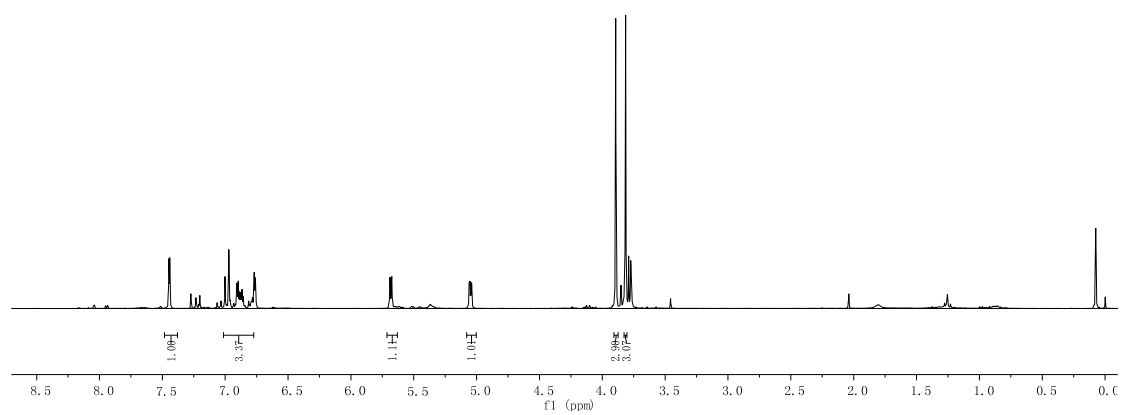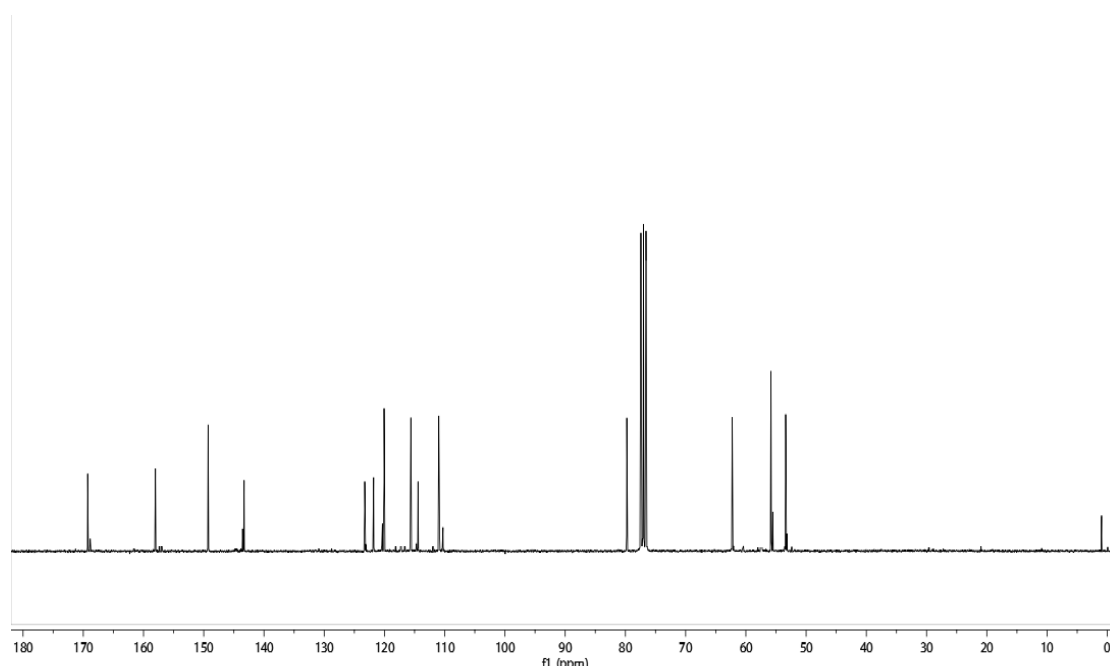

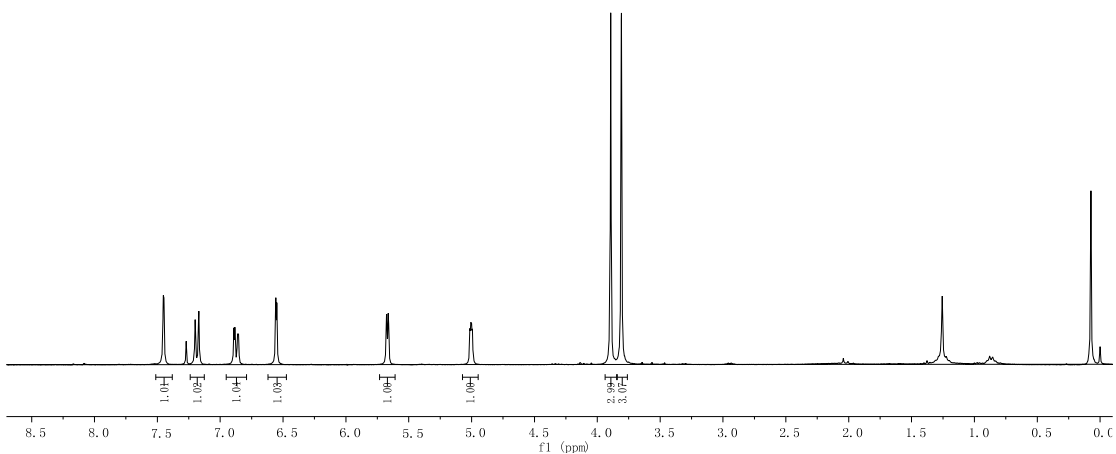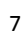

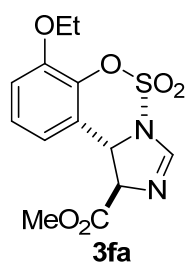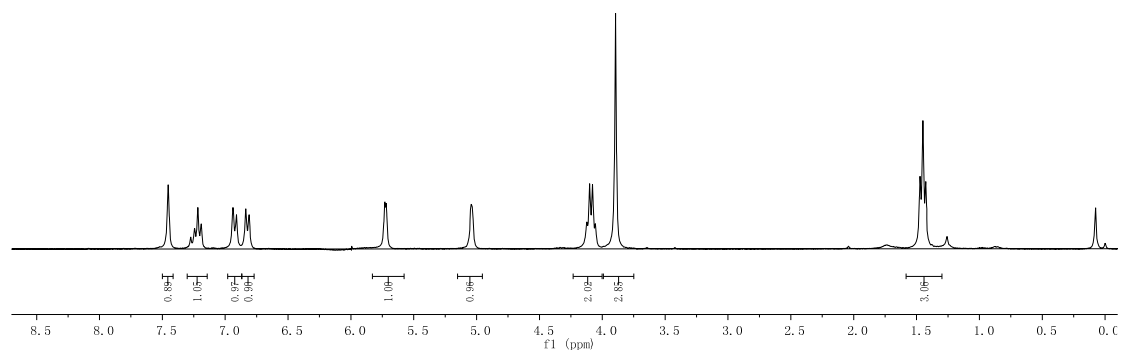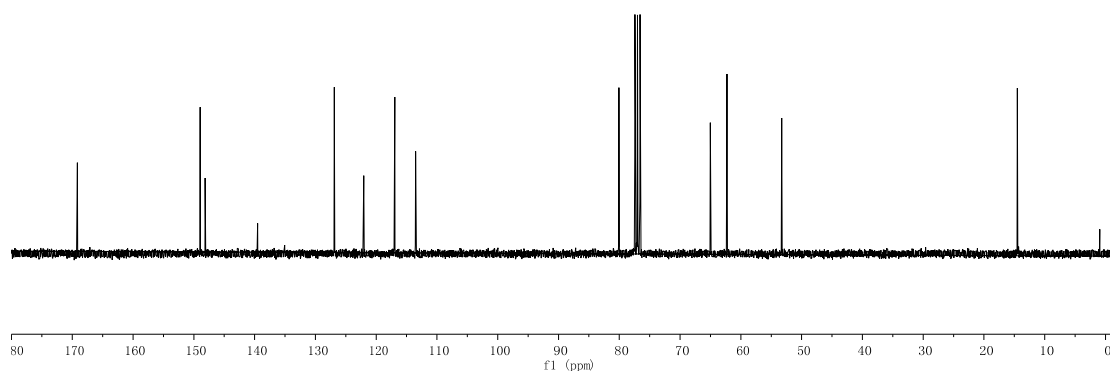



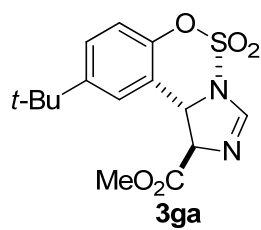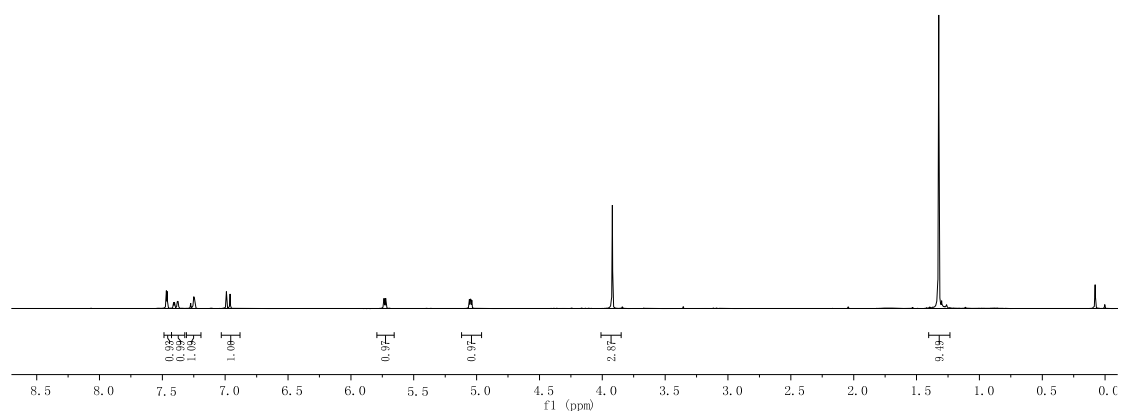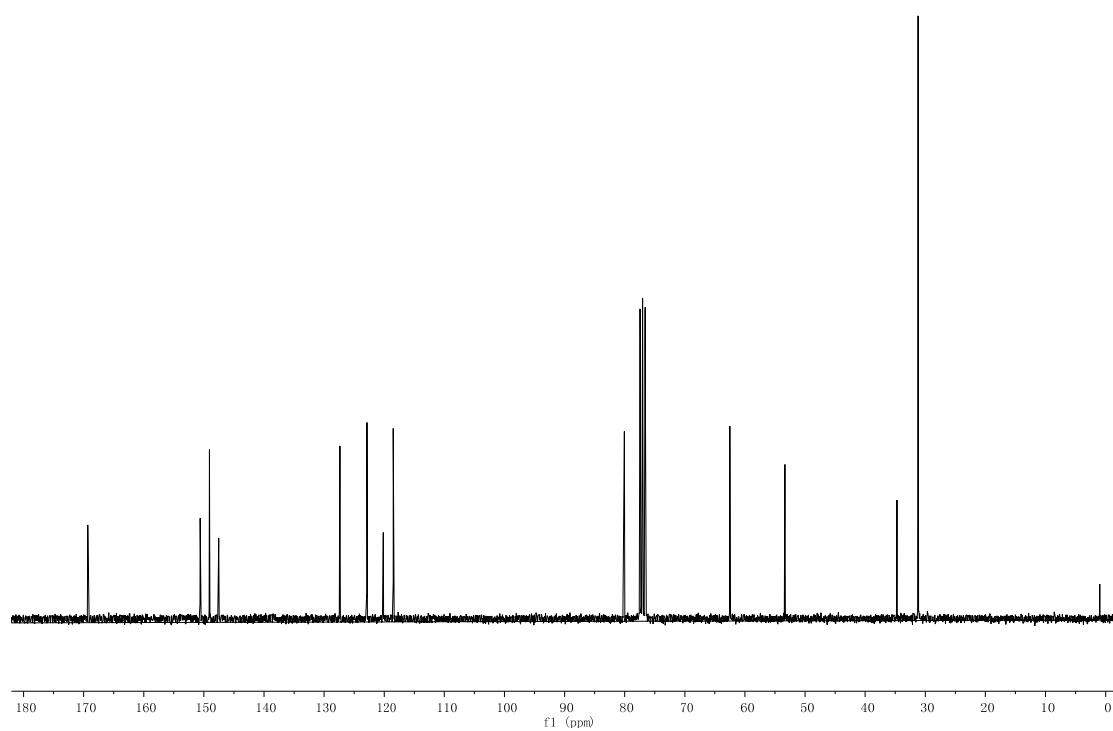

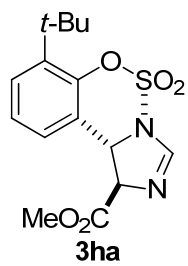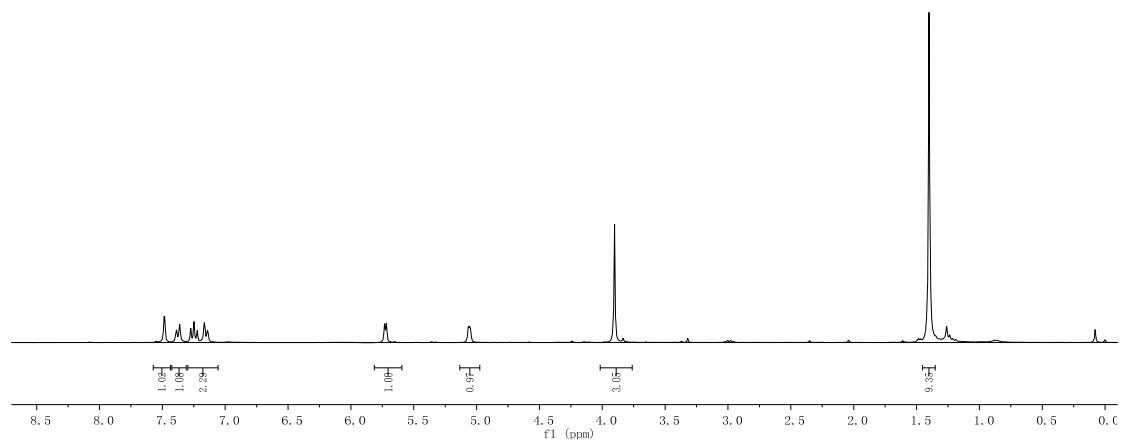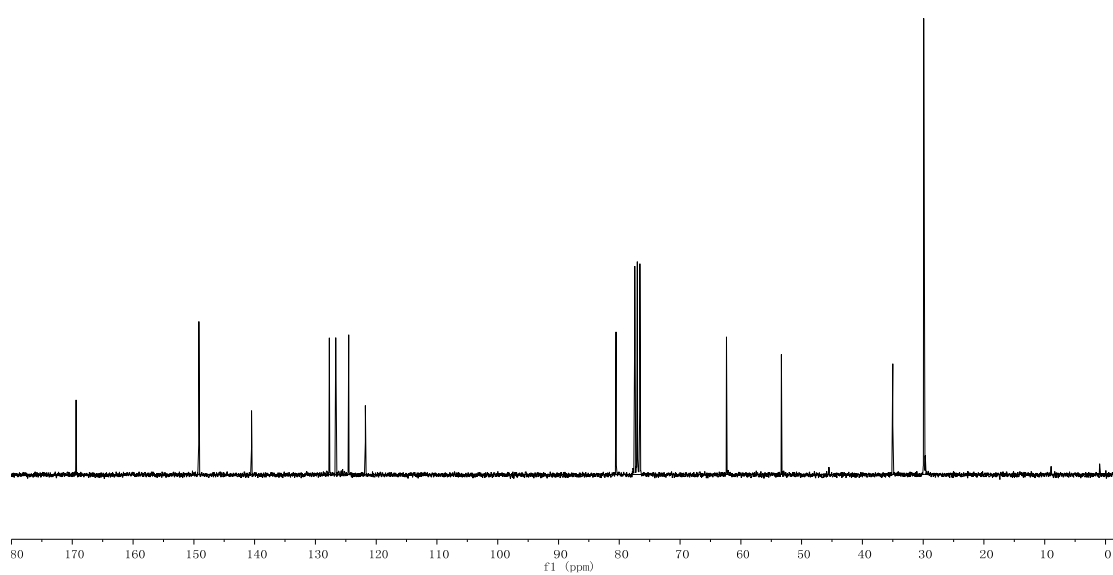

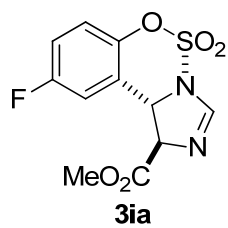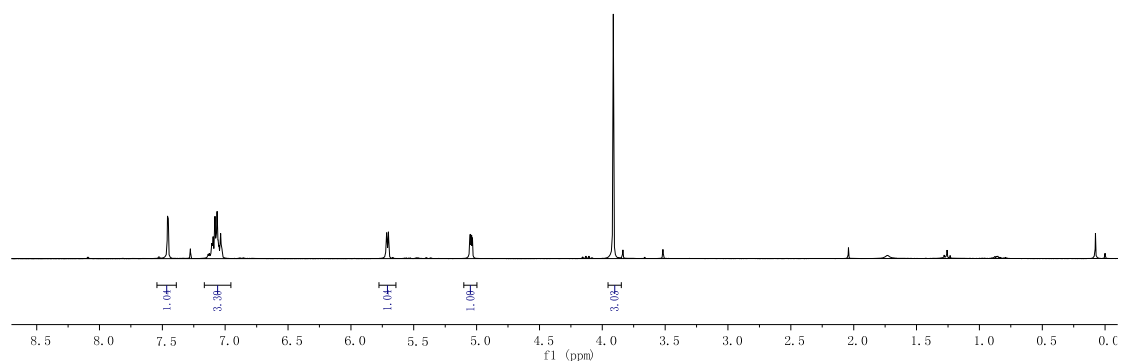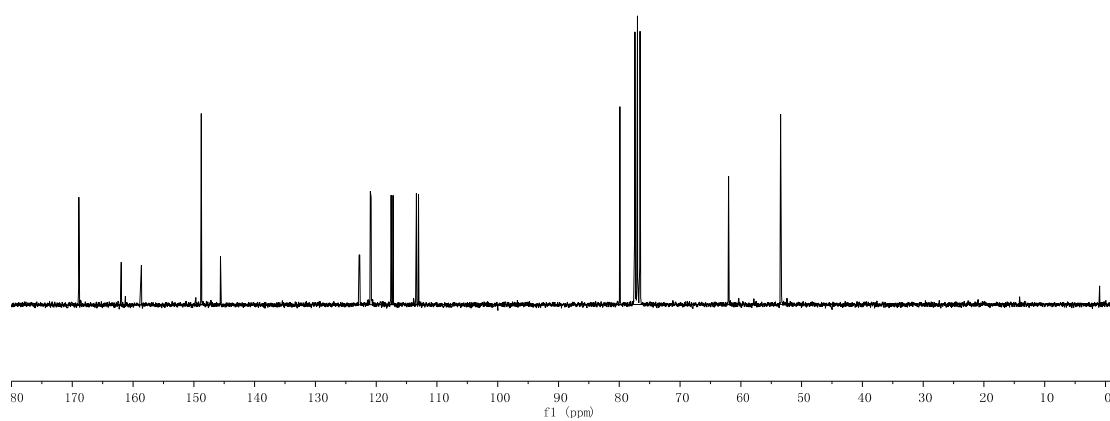

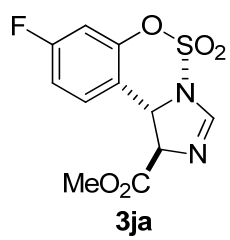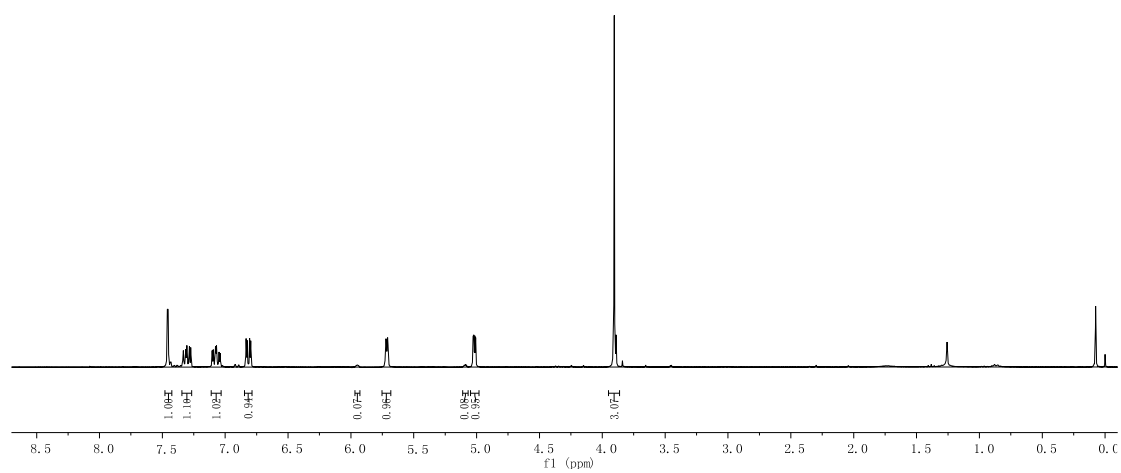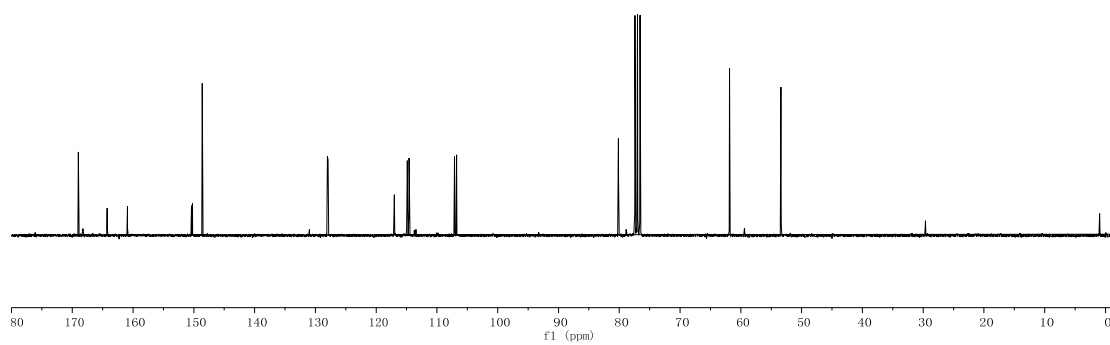

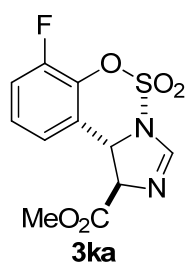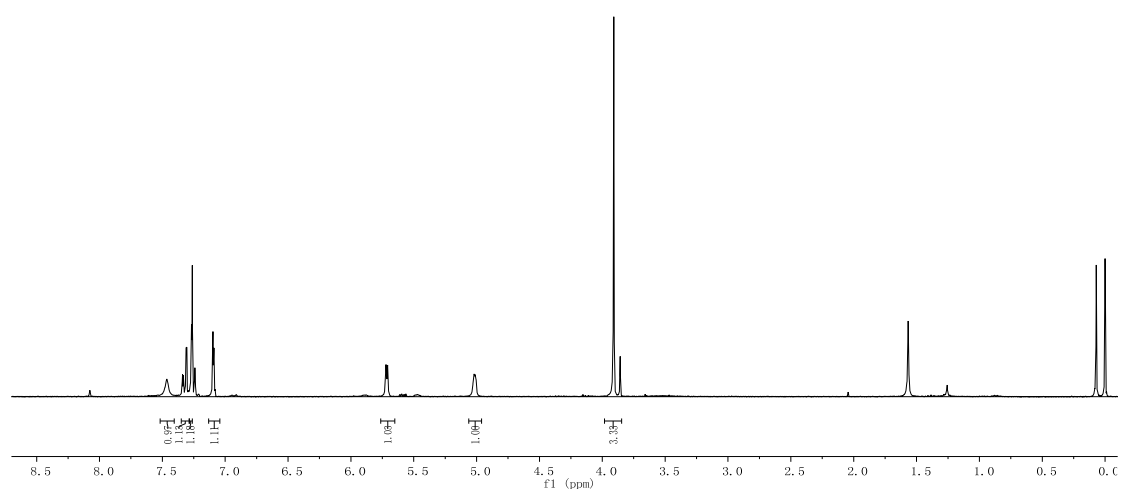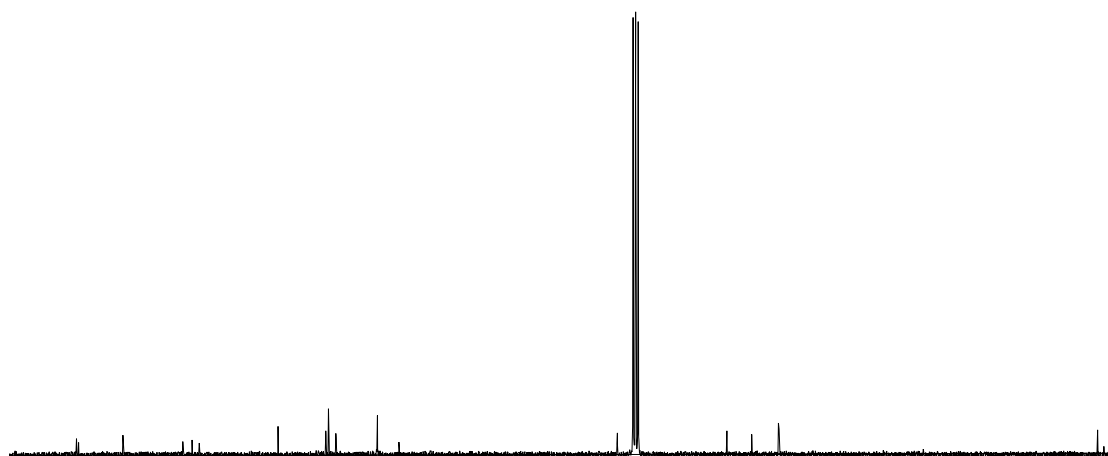

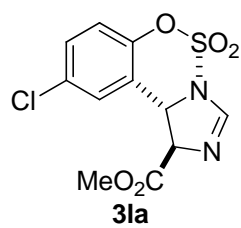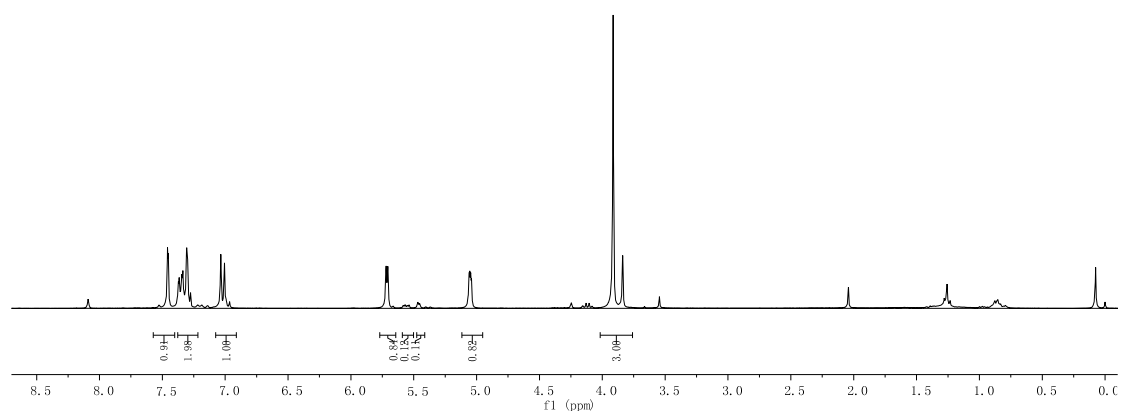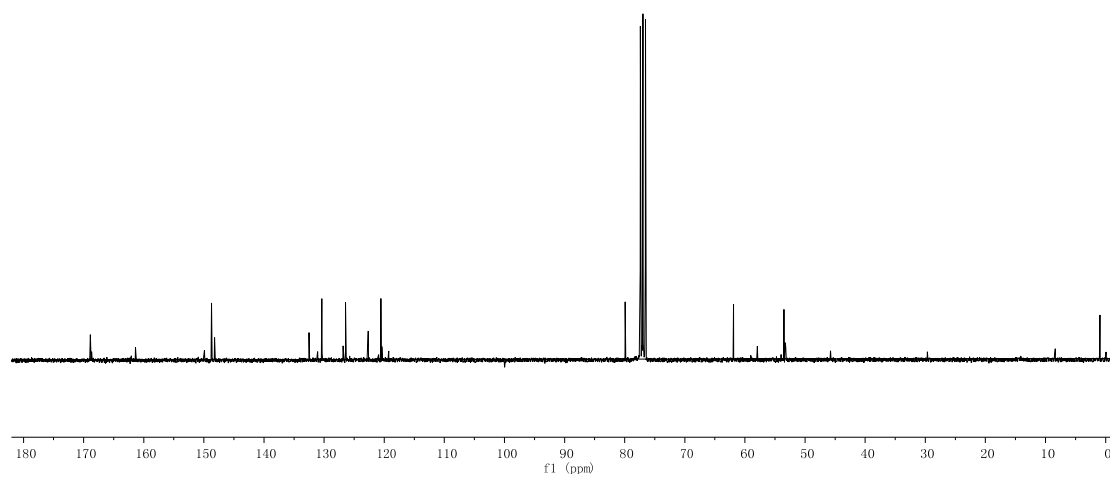

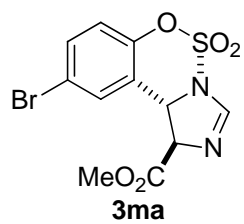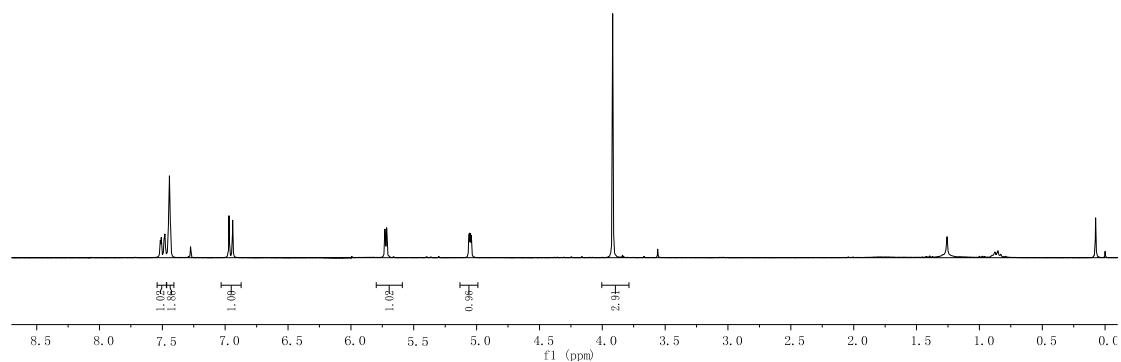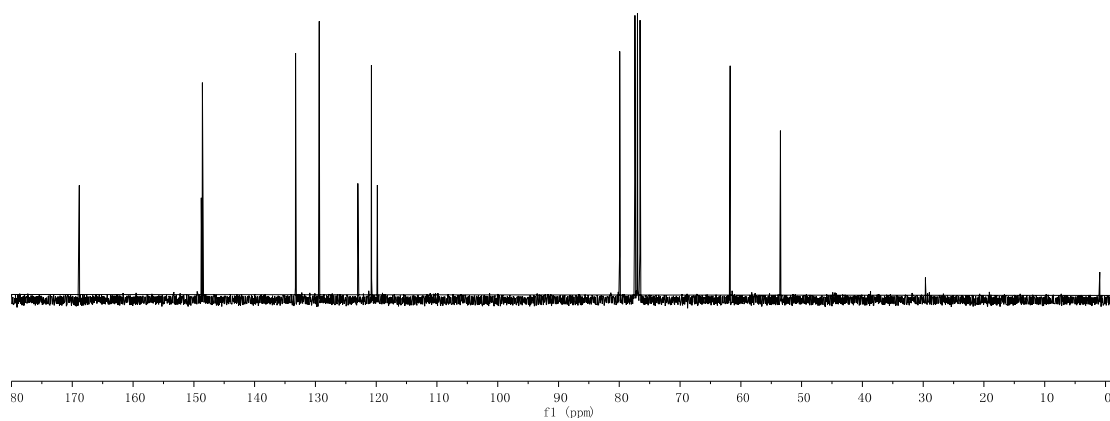

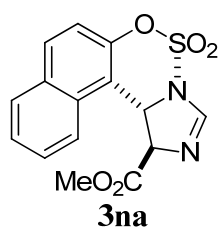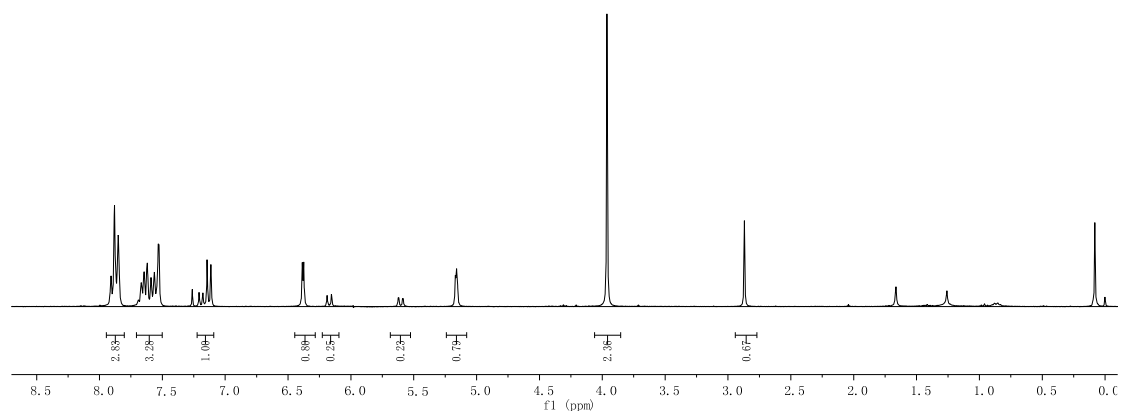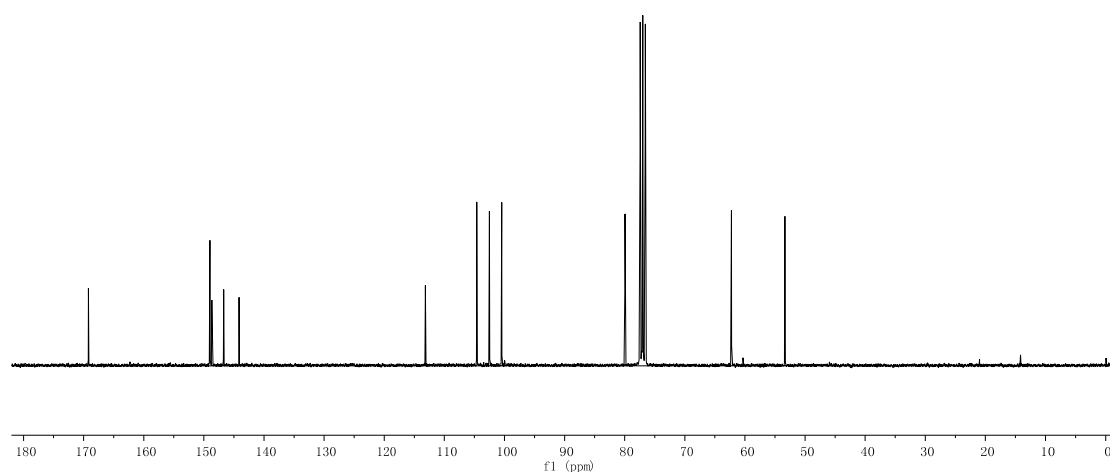



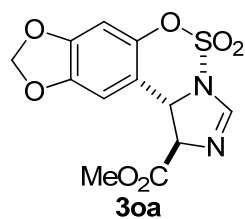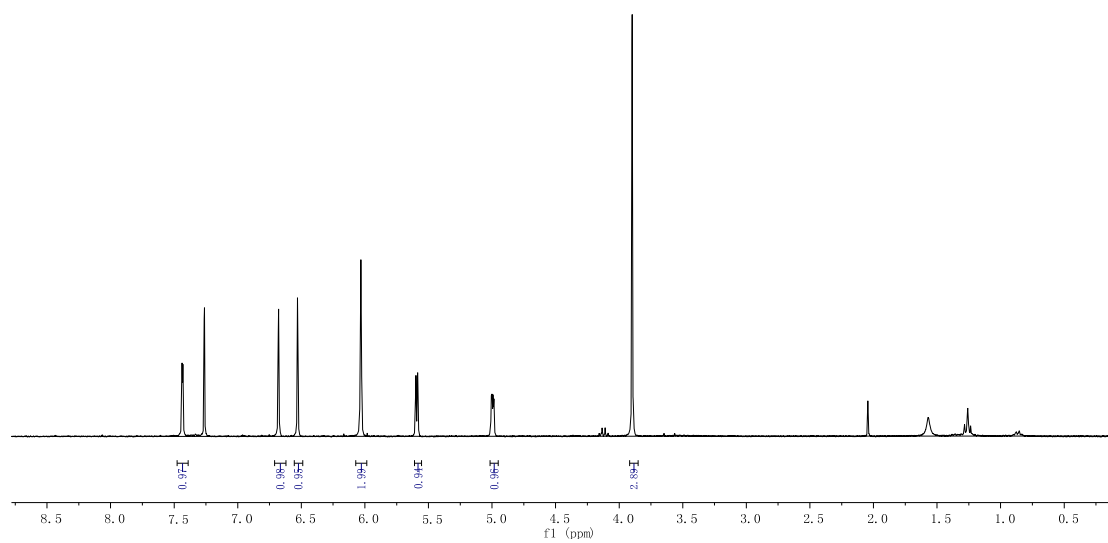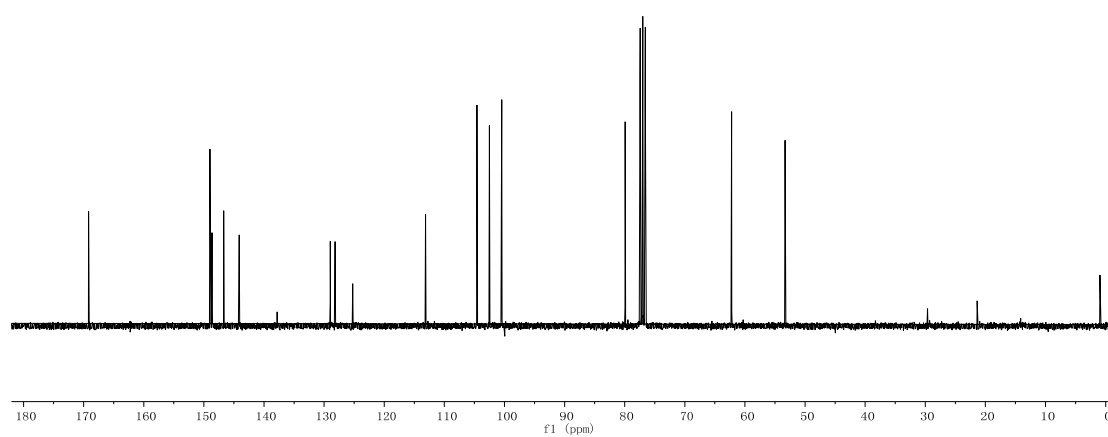

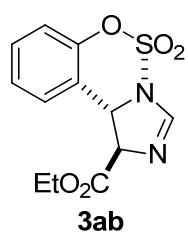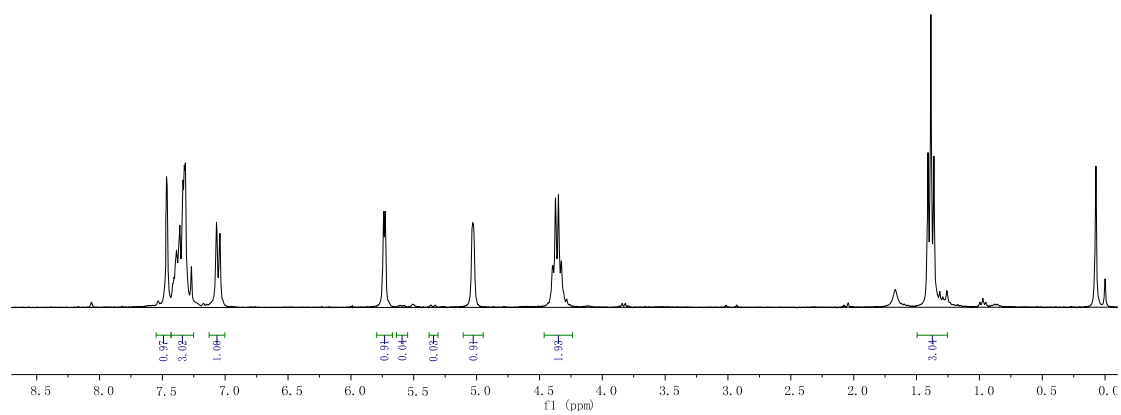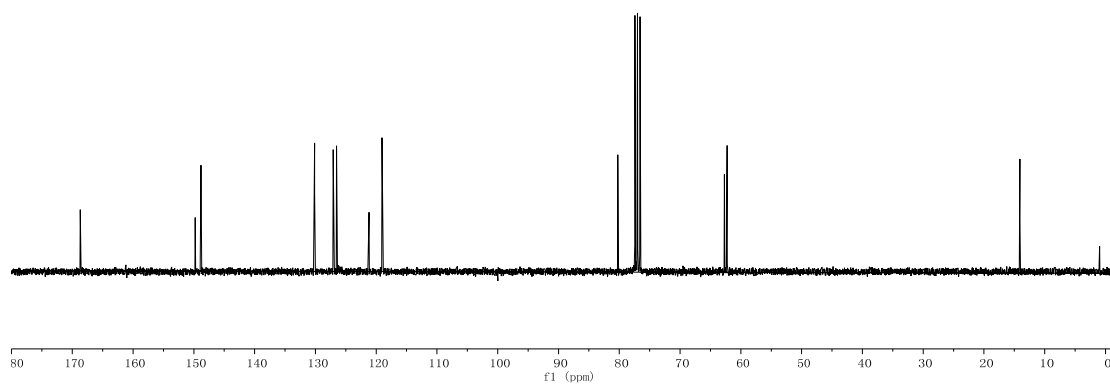

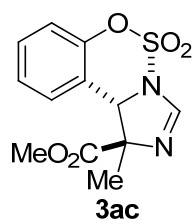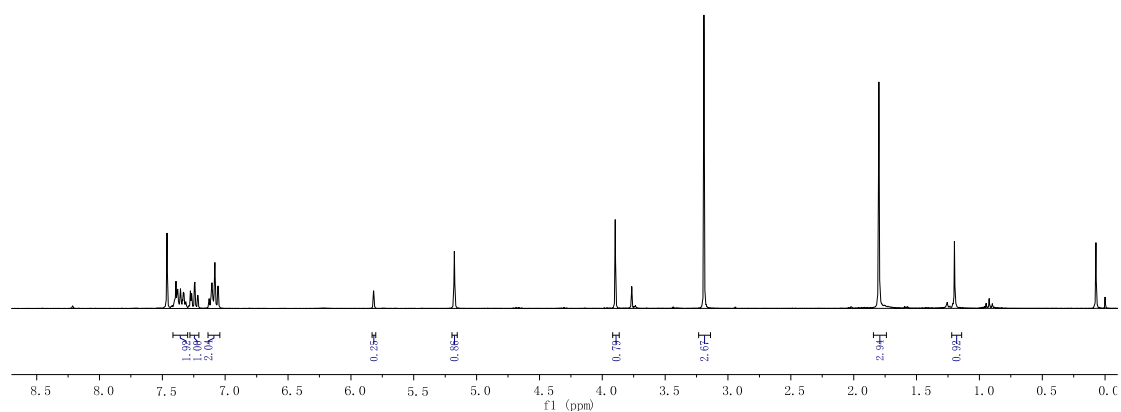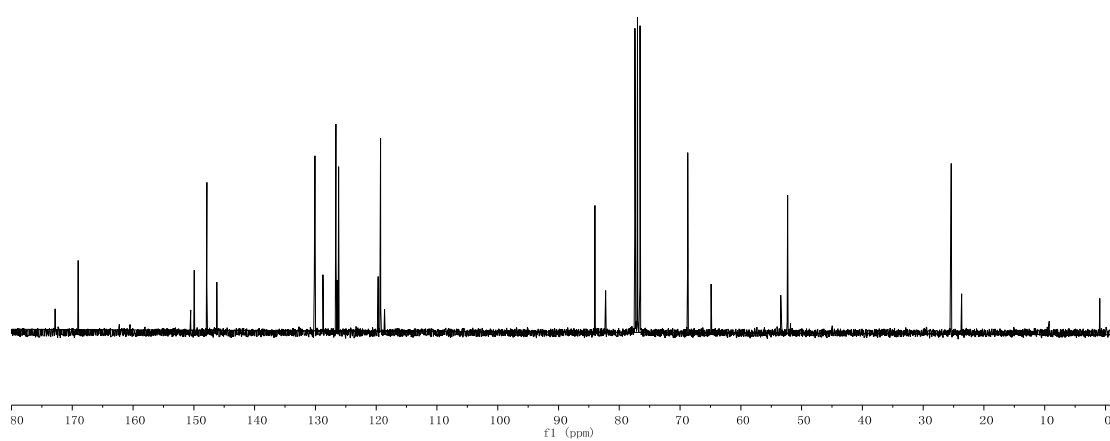

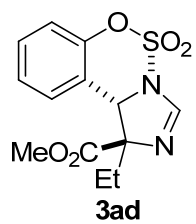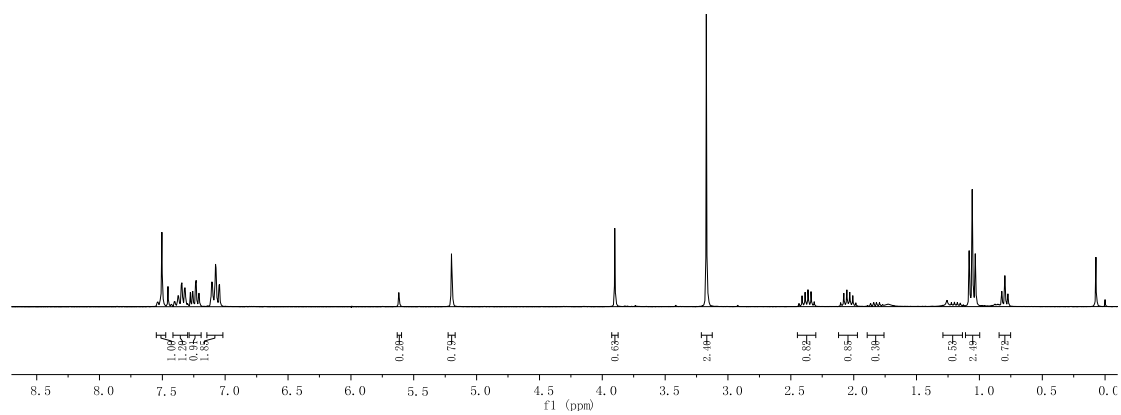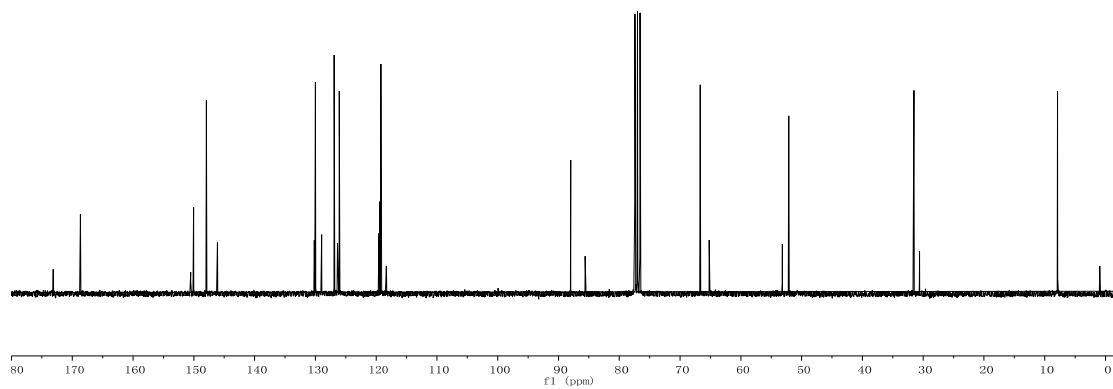

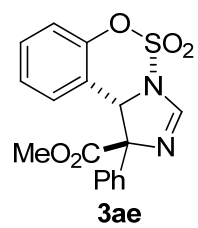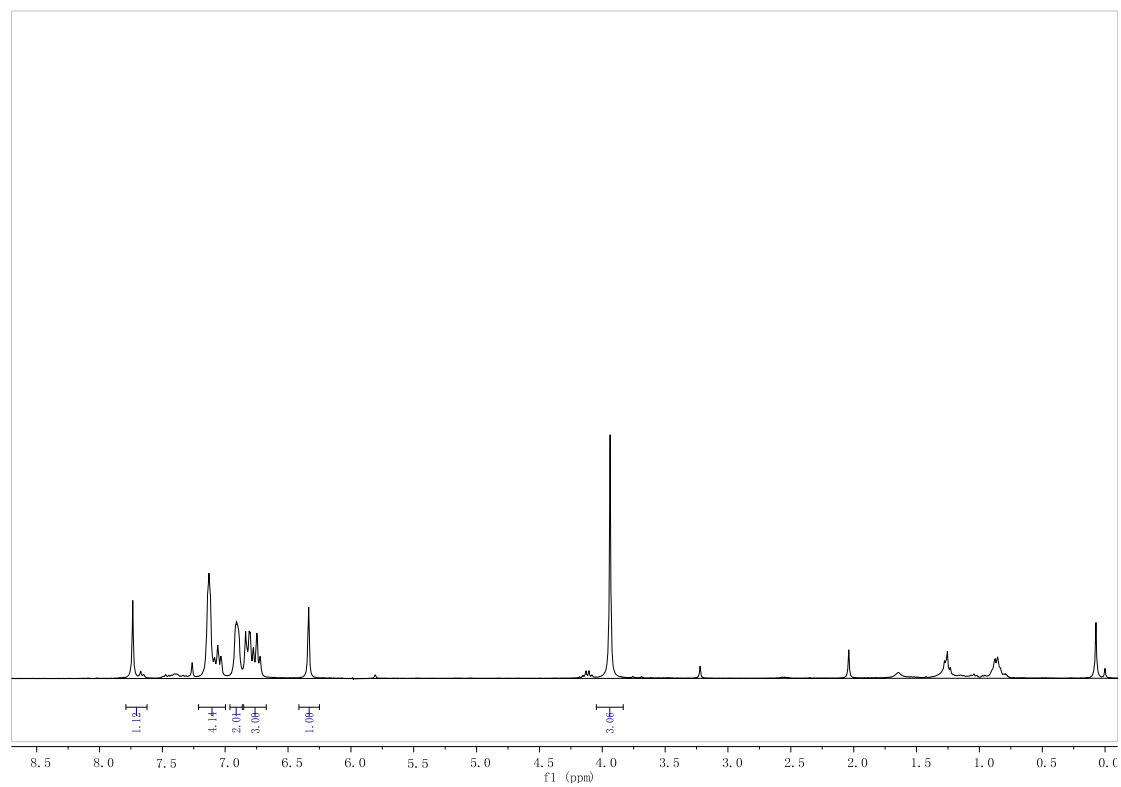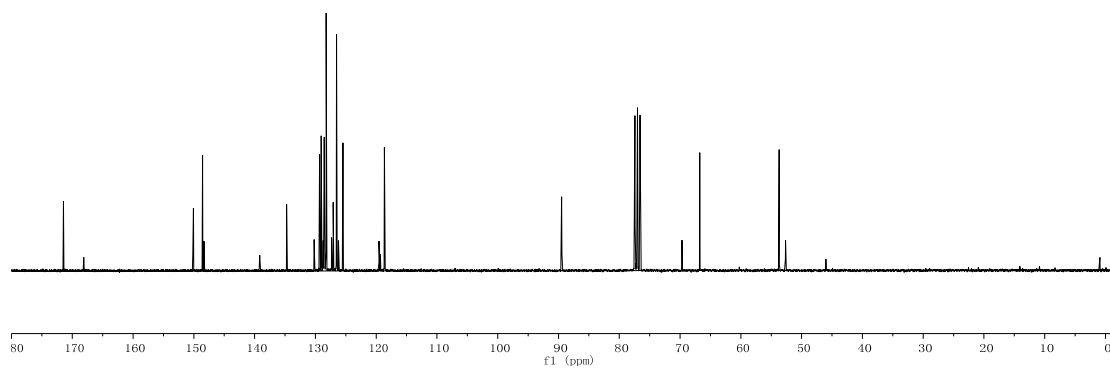

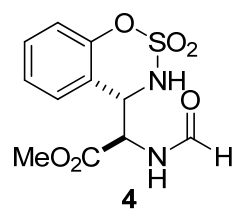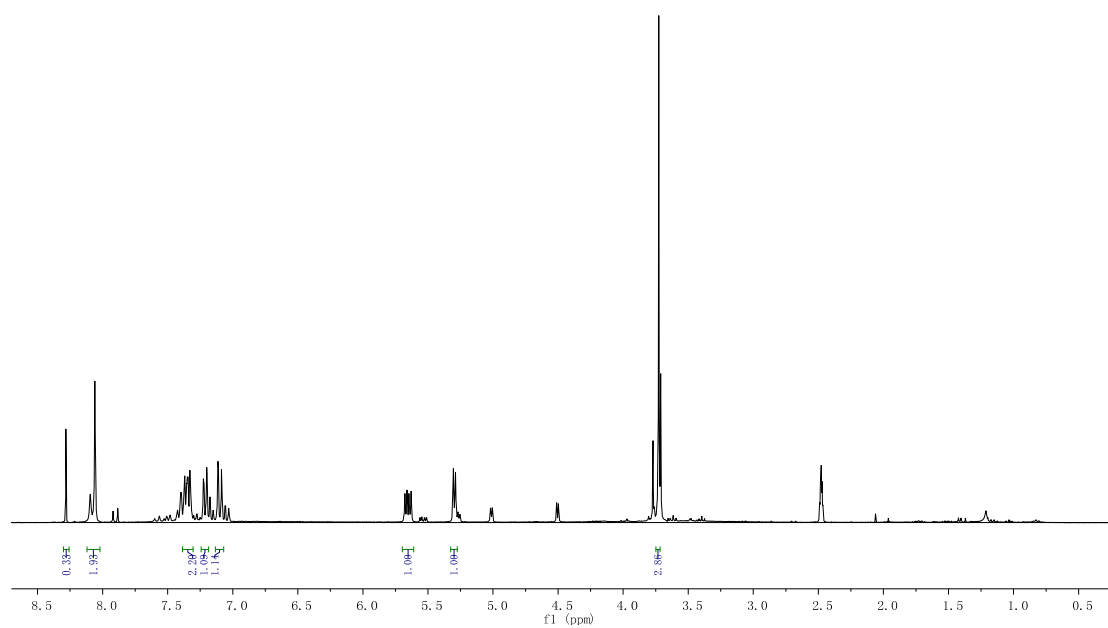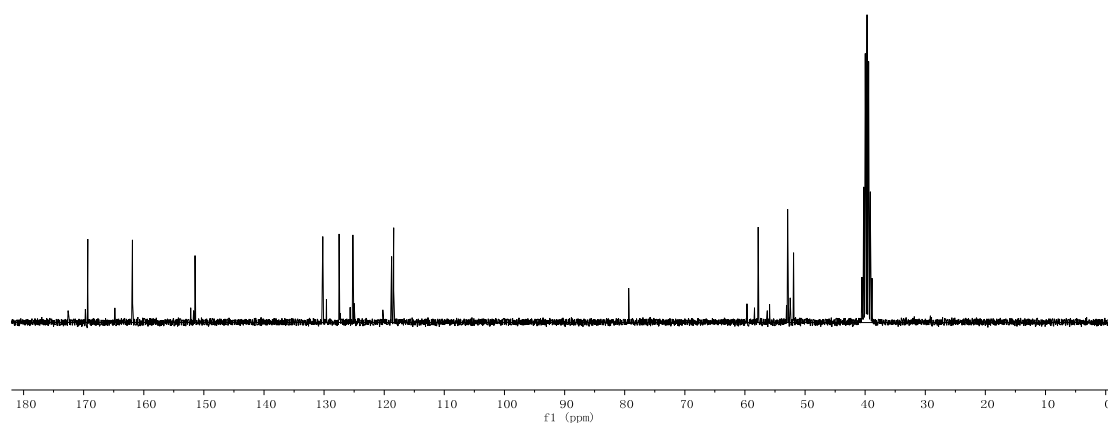

Supplement: c4ob00840e1.pdf [file c4ob00840e1.pdf]
